# Supplementary material for: Development of a novel storm surge inundation model framework for efficient prediction
Source: Copernicus journal article supplement (doi:10.5194/gmd-17-5497-2024), 2024-07-23
Supplement: Supplementary file 1 [file gmd-17-5497-2024-supplement.pdf]

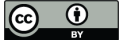

*Supplement of*

## **Development of a novel storm surge inundation model framework for efficient prediction**

**Xuanxuan Gao et al.**

*Correspondence to:* Shuiqing Li ([lishuiqing@qdio.ac.cn](mailto:lishuiqing@qdio.ac.cn)) and Po Hu ([hupo@qdio.ac.cn](mailto:hupo@qdio.ac.cn))

The copyright of individual parts of the supplement might differ from the article licence.

## Instruction manual

Find data from [http:// 10.5281/zenodo.10596631](http://10.5281/zenodo.10596631) (Gao et al.,2024)

Find code from [http:// 10.5281/zenodo.10596826](http://10.5281/zenodo.10596826) (Gao, 2024).

### S1. Folder structure

```
├──Code
│   ├──.idea
│   ├──ANALYSIS
│   ├──HCA-FM
│   ├──PREDATA
│   └──workspace.gdb
├──Data
│   ├──ADCIRC_SWAN
│   │   ├──Hato
│   │   ├──Lekima
│   │   └──Polly
│   ├──FIGURE
│   │   ├──figure1
│   │   ├──figure2
│   │   ├──figure3
│   │   ├──figure4
│   │   ├──figure5
│   │   └──figure6
│   └──HCA_FM
│       ├──CZ
│       │   └──Lekima
│       │       ├──INPUT
│       │       ├──observation
│       │       ├──OUTPUT
│       │       │   ├──ta1_tb1_n0
│       │       └──PreData
│       ├──LZW
│       │   ├──Lekima
│       │   │   ├──compare
│       │   │   ├──INPUT
│       │   │   ├──OUTPUT
│       │   │   │   ├──ta0_tb0_n1
│       │   │   │   ├──ta0_tb1_n1
│       │   │   │   ├──ta1_tb0_n1
│       │   │   │   └──ta1_tb1_n1
│       │   └──PreData
│       └──Polly
```

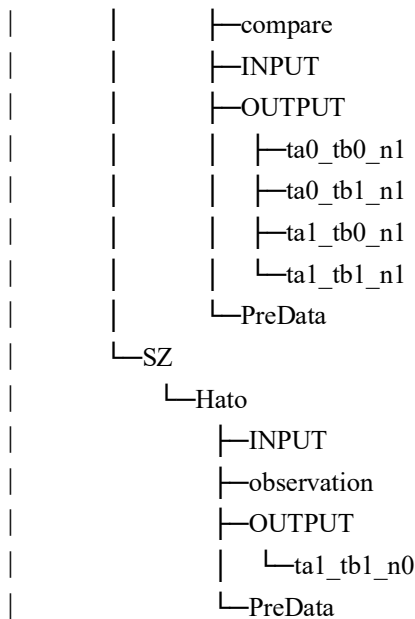

**Notes.**

- **Software requirements:**

*Matlab (R2022a), Python 2.7, ArcGIS (Version 10.8), TeXstudio (Version 2.12.8)*

- **Tips:**

*Please run programs in their path*

*please change workspace path (workspace.gdb) in python programs and mainpath (Data folder) in FloDefs.py before run python programs*

- **Parameters for different experiments (change in the codes)**

*Regions: CZ (Cangzhou, Hebei), LZW (Laizhou Bay), SZ (Shenzhen, Guangdong)*

*Typhoons: Lekima (1909), Polly (9216), Hato (1713)*

- **Description:**

... / Code / PREDATA: code for creating the input files of HCA-FM

FortToMat.m

CreatBC.m (subfunction: m\_UVdir.m)

CreatIC.py (subfunction: FloDefs.py)

... / Code / HCA\_FM: main program and subfunctions of HCA-FM

HCA\_FM.mlx (subfunctions: m\_count.m, m\_neighbor.m)

... / Code / ANALYSIS: main program and sunfunctions to convert files and compare results between two models

Analysis.py (subfunction: FloDefs.py)

... / Data / ADCIRC\_SWAN / Typhoon

input (fort.14/15/22/26) and output (fort.63/64) files of ADCIRC+SWAN coupled model

... / Data / HCA\_FM / Region / Typhoon / PreData

datasets used to creat input files for HCA-FM including DEM, landcover, wind, boundary water level and velocity

... / Data / HCA\_FM / Region / Typhoon / INPUT

input files for HCA-FM: BIC.mat

... / Data / HCA\_FM / Region / Typhoon / OUTPUT

output files of HCA-FM, and comparative results to ADCIRC-SWAN:

OUTDATA.mat

depth.tif, range.shp

analysis.txt, COMPARE.mat

... / Data / HCA\_FM / Region / Typhoon / compare

Points at which comparison is made between HCA-FM and ADCIRC+SWAN results

... / Data / HCA\_FM / Region / Typhoon / observation

field survey data

... / Data / FIGURE: programs to produce figures in paper

## S2. Experimental procedures

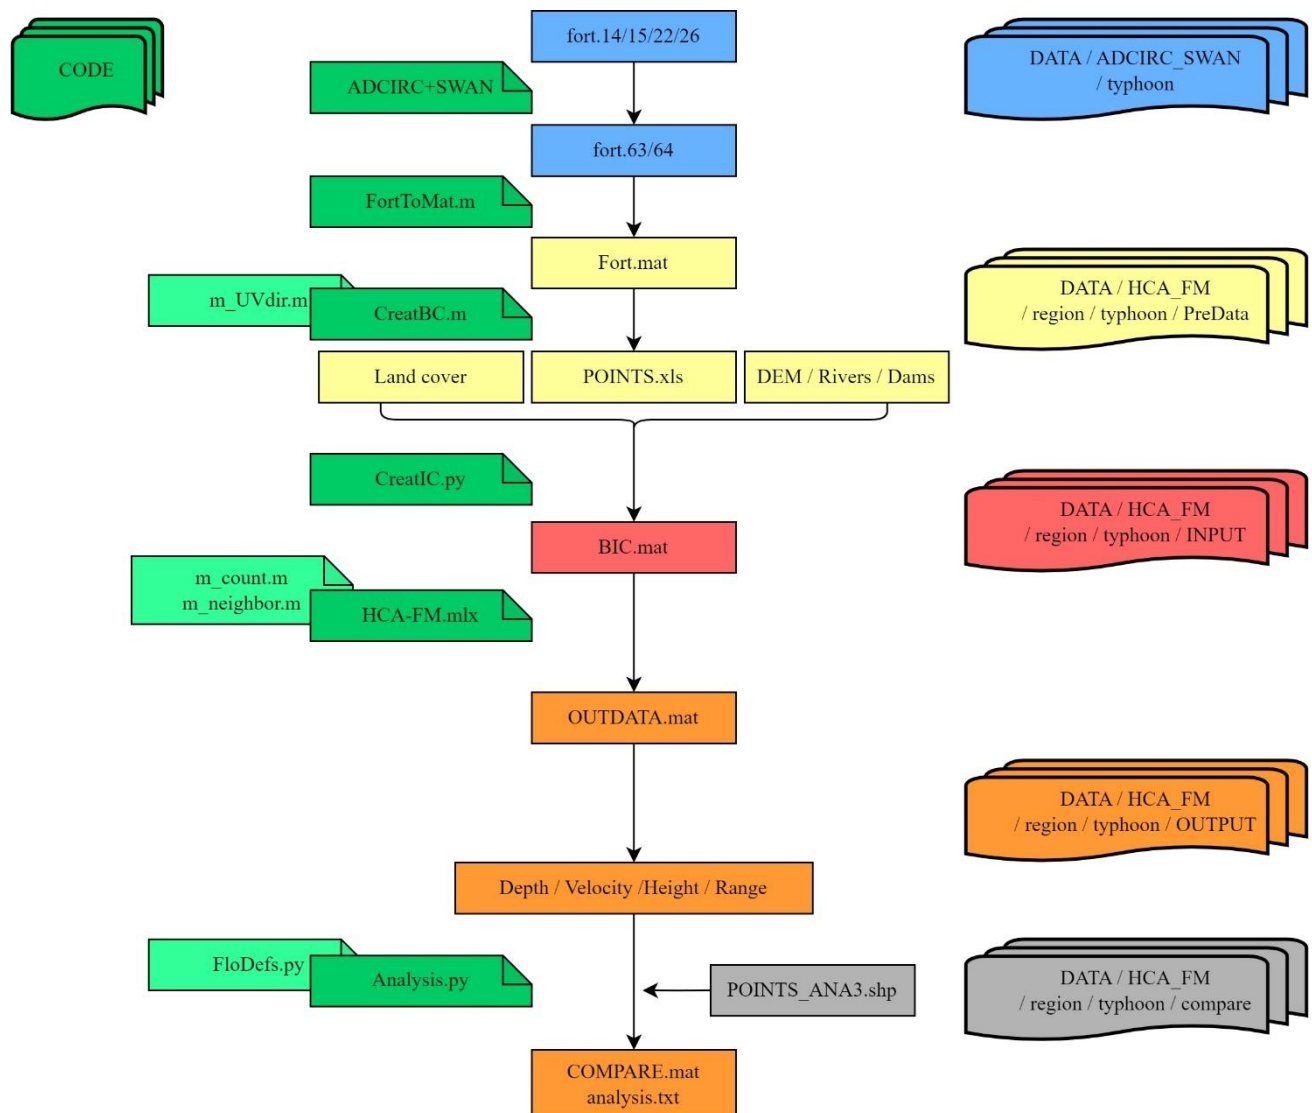

1. Run ADCIRC+SWAN coupled model

- Input fort.14/15/22/26

- Output fort.63/64

Detailed information about ADCIRC+SWAN please refer to

<https://ccht.ccee.ncsu.edu/swanadcirc/>; <https://adcirc.org/home/documentation/adcirc-related-publications/>

2. Prepare input files for HCA-FM

- Run FortToMat.m Output Fort.mat

- Run CreatBC.m      Output POINTS.xls
- Run CreatIC.py      Output BIC.mat
- 3. Run HCA-FM
  - Run HCA\_FM.mlx      Output OUTPUT.mat
- 4. Analysis results
  - Run Analysis.py      Output depth.tif, range.shp  
Output COMPARE.mat, analysis.txt (compared with ADCIRC+SWAN)
- 5. Draw figures
  - Figure 1
  - Figure 2
  - Figure 3
  - Figure 4
  - Figure 5
  - Figure 6
